# Supplementary material for: Fe-Bound Organic Carbon and Sorption of Aromatic Dissolved Organic Carbon in Surface Soil: Comparing a Forest, a Cropland, and a Pasture Soil in the Central Appalachian Region, West Virginia, U.S.A
Source: MDPI journal article supplement (doi:10.3390/environments9090113), 2022-09-02
Supplement: s1 [file s1]

Archive with 1 entries (1 files):
- environments-1866866-supplementary proof Revised2.pdf
